1 **Immune modulation to improve survival of respiratory virus infections in mice**

2 **Authors:** Shradha Wali<sup>1,2</sup>, Jose R. Flores<sup>2</sup>, Ana Maria Jaramillo<sup>2</sup>, David L. Goldblatt<sup>2</sup>,

3 Jezreel Pantaleón García<sup>2</sup>, Michael J. Tuvim<sup>2</sup>, Burton F. Dickey<sup>2</sup>, Scott E. Evans<sup>1,2</sup>

4 **Author affiliations:** <sup>1</sup>University of Texas MD Anderson Cancer Center UTHealth

5 Graduate School of Biomedical Sciences, Houston Texas 77030

6 <sup>2</sup>University of Texas MD Anderson Cancer Center, Department of Pulmonary Medicine,

7 Houston Texas 77030

8 **To whom correspondence should be addressed:** Scott E. Evans, M.D.

9 6565 MD Anderson Blvd

10 Houston TX 77030

11 Email: seevans@mdanderson.org

12 Telephone: 713-563-7433

13 **Author contributions:** S.W. designed and performed the experiments, analyzed the

14 data, and wrote the manuscript. J.R.F., A.M.J., D.L.G. and J.P.G performed

15 experiments. M.J.T., B.F.D. conceptualized the project and critically reviewed the data.

16 S.E.E. conceptualized the project, designed experiments, provided critical evaluation of

17 data and edited the manuscript. <sup>1</sup>

18

---

<sup>1</sup> This study was supported by NIH grants R01 HL117976, DP2 HL123229 and R35 HL144805 to S.E.E.

19 **Running Title:** Epithelial defence against viral immunopathology

20 **Abstract**

21 Viral pneumonia remains a global health threat requiring novel treatment strategies, as  
22 strikingly exemplified in the SARS-CoV-2 pandemic of 2019-2020. We have reported  
23 that mice treated with a combination of inhaled Toll-like receptor (TLR) 2/6 and TLR 9  
24 agonists (Pam2-ODN) to stimulate innate immunity are broadly protected against  
25 respiratory pathogens, but the mechanisms underlying this protection remain  
26 incompletely elucidated. Here, we show in a lethal paramyxovirus model that Pam2-  
27 ODN-enhanced survival is associated with robust virus inactivation by reactive oxygen  
28 species (ROS), which occurs prior to internalization by lung epithelial cells. However,  
29 we also found that mortality in sham-treated mice temporally corresponded with CD8<sup>+</sup> T  
30 cell-enriched lung inflammation that peaks on days 11-12 after viral challenge, when the  
31 viral burden has waned to a scarcely detectable level. Pam2-ODN treatment blocked  
32 this injurious inflammation by reducing the viral burden, and alternatively, depleting  
33 CD8<sup>+</sup> T cells 8 days after viral challenge also decreased mortality. These findings reveal  
34 opportunities for targeted immunomodulation to protect susceptible individuals against  
35 the morbidity and mortality of respiratory viral infections.

36

37 **Keywords:** Immunomodulation, immunopathology, CD8<sup>+</sup> T cells, viral pneumonia,  
38 inducible epithelial resistance

39

40 **Introduction**

41 Viruses are the most frequent cause of community acquired pneumonia in children and  
42 adults, resulting in significant morbidity in vulnerable subjects and exerting a  
43 tremendous health care burden (1-5). Seasonal influenza and emergent pandemic  
44 viruses, such as SARS-CoV-2, inflict particular mortality in susceptible individuals, with  
45 clinicians frequently lacking effective interventions to improve patient outcomes (6-9).  
46 Moreover, in addition to causing acute disease, respiratory virus infections are often  
47 complicated by chronic lung pathologies, such as asthma induction, progression and  
48 exacerbation (10-12). Therefore, development of novel therapeutic anti-viral strategies  
49 is required to effectively prevent and treat respiratory infections and their associated  
50 chronic complications (13, 14).

51

52 While lung epithelial cells are the principal targets of most respiratory viruses (15), there  
53 is expanding evidence that lung epithelia themselves are capable of generating anti-  
54 microbial responses (12, 16, 17). We hypothesized that lung epithelial cells can be  
55 harnessed to control virus replication, thereby enhancing acute survival and reducing  
56 chronic complications of virus infections (18-21). Our group has previously described  
57 the phenomenon of inducible epithelial resistance wherein the lungs' mucosal defenses  
58 can be broadly stimulated to protect against a wide range of respiratory pathogens,  
59 including viruses (18-23). This protection is induced by a single inhalation of a  
60 combination treatment consisting of Toll like receptor (TLR) 2/6 and 9 agonists (Pam2-  
61 ODN) shortly before or after viral challenge. While no individual leukocyte populations  
62 have been identified as critical for Pam2-ODN-induced resistance, lung epithelial cells  
63 are essential to the inducible anti-viral response (18). Further, we have shown that

64 Pam2-ODN mediated protection is dependent upon epithelial generation of reactive  
65 oxygen species (ROS) but, interestingly, does not require Type I interferons (22, 23).  
66 More recently, we have shown prevention of chronic virus-induced asthma in mice  
67 treated with Pam2-ODN but we have not clarified the anti-viral mechanisms (24).

68

69 In this study, we investigated the mechanisms of Pam2-ODN enhanced mouse survival  
70 of pneumonia caused by a paramyxovirus, Sendai virus (SeV). We found that Pam2-  
71 ODN treatment not only reduced lung SeV burden but also decreased epithelial cell  
72 injury and host immunopathologic leukocyte responses to SeV infections. While CD8<sup>+</sup> T  
73 cells are known to contribute to anti-viral immunity, it is shown here that CD8<sup>+</sup> T cells  
74 contribute substantially to mortality, and this effect can be prevented by Pam2-ODN  
75 treatment early in the course of infection or CD8<sup>+</sup> depletion late in the course. Further,  
76 we demonstrate anti-viral mechanisms of inducible epithelial resistance, where virus  
77 particles are inactivated in a ROS-dependent manner prior to internalization by their  
78 epithelial targets.

79

## 80 **Materials and Methods**

81 **Mice:** All *in vivo* experiments were performed using 6- to 10-week-old C57BL/6J mice of  
82 a single sex and were handled according to the Institutional Animal Care and Use  
83 Committee of MD Anderson Cancer Center, protocol 00000907-RN01.

84

85 **Cells:** Mouse lung epithelial (MLE-15) cells were kindly provided by Jeffrey Whitsett,  
86 Cincinnati Children's Hospital Medical Center. Mouse tracheal epithelial cells were  
87 harvested and cultured as previously described (22, 25). See *Supplemental Methods* for  
88 additional details.

89

90 **TLR treatments and viral challenges:** Cells were treated with Pam2CSK<sub>4</sub> (2.2 μM)  
91 and ODN M362 (0.55 μM) as previously described (22, 23). Mice were treated with 10  
92 ml of Pam2CSK<sub>4</sub> (4 μM) and ODN M362 (1 μM) by nebulization as previously described  
93 (22, 23). For *in vitro* challenges, SeV at multiplicity of infection (MOI) = 1 was used.  
94 Unless otherwise stated, mice were challenged with 1 x 10<sup>8</sup> plaque forming units (pfu)  
95 inserted into the oropharynx as described (24). See *Supplemental Methods* for  
96 additional details.

97

98 **Flow cytometry:** Single cells from disaggregated lungs or cell culture were stained as  
99 indicated in the antibody table (Table 1), fixed, and acquired on a BD LSRII (BD  
100 Biosciences). See *Supplemental Methods* for additional details.

101

102 **Epithelial proliferation assays:** Epithelial proliferation was determined by staining lung  
103 sections for EdU 24 h after intraperitoneal injection. See *Supplemental Methods* for  
104 details.

105

106 **CD8<sup>+</sup> T cell depletion:** Anti-CD8- $\beta$  antibody (200  $\mu$ g/mouse, clone 53-5.8, Bioxell) was  
107 delivered to mice intraperitoneally at indicated time points. CD8<sup>+</sup> T cell depletion was  
108 confirmed by flow cytometry analysis 24 to 48 h after depletion.

109

110 **Viral burden quantification:** Viral burden was determined by reverse transcription  
111 quantitative PCR (RT-qPCR) of the Sendai Matrix (M) protein normalized to host house-  
112 keeping gene 18SRNA. For *in vivo* experiments, mouse lungs were collected 5 days  
113 after SeV challenge. For *in vitro* experiments, cell lysates were collected 24 h after  
114 infection, unless otherwise indicated. See *Supplemental Methods* for additional details.

115

116 **ROS inhibition *in vitro* and *in vivo*:** NADPH oxidase activity was inhibited using  
117 GKT137831 (Selleckchem). Mitochondrial ROS production was inhibited using the  
118 combination of FCCP (Cayman Chemicals) and TTFA (Cayman Chemicals). See  
119 *Supplemental Methods* for additional details.

120

121 **Viral attachment assays:** For most enveloped viruses, internalization into epithelial  
122 cells is inhibited at 4<sup>o</sup> C without affecting viral binding to epithelial cells (26-28). MLE-15  
123 cells were infected with SeV at 4<sup>o</sup> C for 4 h, washed to remove unattached virus, then  
124 assessed for uninternalized SeV burden using immunofluorescence or flow cytometry.  
125 See *Supplemental Methods* for additional details.

126

## 127 **Results**

### 128 **Enhanced mouse survival of SeV infection by Pam2-ODN treatment**

129 Aerosolized Pam2-ODN treatment one day prior to SeV challenge increased mouse  
130 survival of SeV challenge (Figure 1A), similar to the protection observed against lethal  
131 influenza pneumonia (18, 21, 22). The survival benefit was associated with reduced  
132 lung SeV burden, as measured by SeV M gene expression (Figure 1B). Investigating  
133 the natural progression of infection revealed that SeV lung burden was maximal on day  
134 5 and gradually decreased until falling below the limit of quantification (LOQ) by day 11  
135 (Figure 1C). Pam2-ODN pretreatment reduced SeV burden on all assessed days  
136 (Figure 1C). Although the lethality of SeV infection was exquisitely dependent on the  
137 inoculum size, we strikingly found that peak mortality paradoxically occurred around  
138 days 10 to 12 after infection irrespective of inoculum size, despite the fact that SeV is  
139 essentially undetectable that long after challenge (Figure 1A, C, and D).

140

### 141 **Pam2-ODN treatment attenuates SeV-induced epithelial injury**

142 This temporal dissociation between peak virus burden and peak mortality led to the  
143 hypothesis that SeV-induced mortality may not be exclusively driven by excessive virus  
144 burden but may also result from untoward SeV-induced host immune response.  
145 Therefore, the acute changes in mouse lungs following SeV infection were  
146 characterized. We found increases in lung epithelial cleaved caspase 3 (cCasp3), a  
147 marker for programmed cell death, on days 7 to 11 after SeV infection (Figure 2A, upper  
148 panel). Virus infection-related epithelial cell injury and death is typically associated with

149 proliferative repair mechanisms (29, 30). Staining the infected mouse lung tissue for  
150 Ki67 and EdU revealed maximum signals for both markers in the second week after  
151 infection (Figure 2B-E, upper panel). These events of lung epithelial cell death and  
152 proliferation coincided with the peak of mortality (day 12, Figure 1E). Further,  
153 hematoxylin and eosin staining of lung tissues infected with SeV showed profound  
154 increases in inflammatory cells from days 7 to 10 with evidence of damaged airway and  
155 parenchymal tissue (Figure 2F). However, Pam2-ODN pretreatment of mice reduced  
156 epithelial cell injury and proliferation (Figure 2A-E, lower panel). This temporal  
157 association of epithelial injury and death after viral clearance supported our hypothesis  
158 that mouse mortality caused by SeV infection is due in part to the host immune  
159 response to SeV infections.

160

### 161 **Pam2-ODN attenuates SeV-induced lymphocytic lung inflammation.**

162 To explore this hypothesis, the host leukocyte response to SeV infection was  
163 characterized. Differential Giemsa staining of bronchoalveolar lavage (BAL) cells  
164 revealed increased neutrophils on days 2 to 5 and increased macrophages on days 5 to  
165 8 (Figure 3A, left and middle panel, solid grey line) after SeV challenge. Congruent with  
166 our prior studies, inhaled treatment with Pam2-ODN in the absence of infection led to a  
167 rapid rise in neutrophils that was resolved within 5 days (Figure 3A, dashed line) (31).  
168 The neutrophil response to SeV challenge was modestly increased among mice  
169 pretreated with Pam2-ODN (Figure 3A, left panel, solid dark line). Pam2-ODN-treated,  
170 SeV-challenged mice showed almost no difference in macrophage number compared to  
171 PBS-treated, SeV-challenged mice (Figure 3A, middle panel, solid dark line). A rise in



172 lymphocytes was observed on days 8 to 11 in PBS-treated, SeV-challenged mice  
173 (Figure 3A, right panel, solid grey line), temporally corresponding with peak mortality.  
174 However, Pam2-ODN treated, SeV-challenged mice displayed significantly reduced  
175 lymphocyte numbers at every time point assessed (Figure 3A, right panel, solid dark  
176 line). The gating strategy for lymphocyte subsets by flow cytometry is shown in  
177 Supplementary Figure 1. A modest reduction in CD4<sup>+</sup> T cells was observed in Pam2-  
178 ODN-treated, SeV-challenged mice compared to PBS-treated, SeV-challenged mice  
179 (Supplementary Figure 2). We also found the percentage of CD19<sup>+</sup> B220<sup>+</sup> B cells  
180 reduced after SeV infection in comparison to Pam2-ODN treated and uninfected mice  
181 (Supplementary Figure 2), as has been seen with other viral models (32, 33). However,  
182 the biggest difference between groups was in CD8<sup>+</sup> T cells, with Pam2-ODN-treated,  
183 SeV-challenged mice displaying a significantly lower number and percentage of CD8<sup>+</sup> T  
184 cells than PBS treated, SeV-challenged mice (Figure 3B, C). Since the greatest  
185 difference after Pam2-ODN treatment was in CD8<sup>+</sup> T cell levels and there was a tight  
186 correlation between peak mortality and the increase in lung CD8<sup>+</sup> T cells on days 8 to  
187 11, we investigated the role of CD8<sup>+</sup> T cells in SeV-induced mortality.

188

### 189 **Depleting CD8<sup>+</sup> T cells after viral clearance enhances survival of SeV infection**

190 To understand the apparent contributions of host immunopathology to mouse  
191 outcomes, we depleted CD8<sup>+</sup> T cells on day 8 -- after virus burden was substantially  
192 reduced but before peak mouse mortality (Figures 1 and 4A). Mice depleted of CD8<sup>+</sup> T  
193 cells displayed significantly enhanced survival of SeV challenge compared to mice with  
194 intact CD8<sup>+</sup> T cells (Figure 4B). Depletion of CD8<sup>+</sup> T cells was confirmed by flow

195 cytometry in disaggregated lung cells 10 days after SeV challenge (Figure 4C,  
196 Supplementary Figure 3A). We also assessed lung injury by hematoxylin and eosin  
197 staining of lung tissue 10 days after SeV challenge and found increased inflammation  
198 and epithelial cell damage in undepleted mice compared to CD8<sup>+</sup> T cell-depleted mice  
199 (Figure 4D). This supported our hypothesis that CD8<sup>+</sup> T cells contribute to fatal SeV-  
200 induced immunopathology.

201

202 To assess the role of CD8<sup>+</sup> T cells throughout the course of infection, mouse CD8<sup>+</sup> T  
203 cells were depleted prior to and during SeV challenge (Figure 4A, Supplementary  
204 Figure. 3A, B). This depletion resulted in significantly reduced survival of SeV infection  
205 (Supplementary Figure 3C), compatible with the known antiviral functions of CD8<sup>+</sup> T  
206 cells (34-36). However, it is notable that Pam2-ODN treatment still significantly  
207 enhanced survival of SeV challenge even in the absence of CD8<sup>+</sup> T cells  
208 (Supplementary Figure 3C). This finding was congruent with our previous studies  
209 showing Pam2-ODN inducible resistance against bacterial pneumonia despite the lack  
210 of mature lymphocytes (*Rag1*<sup>-/-</sup>) (18).

211

## 212 **Pam2-ODN treatment leads to extracellular inactivation of virus particles**

213 As the antiviral protection consistently correlated with reduced viral burden *in vivo*, and  
214 as the reduced virus burden likely contributes to the reduced CD8<sup>+</sup> T cell levels, we  
215 sought to determine how Pam2-ODN-induced responses cause antiviral effects.

216 Assessing the effect of Pam2-ODN on SeV burden in immortalized mouse epithelial

217 cells (MLE-15) and primary mouse tracheal epithelial cells (mTEC), we found that  
218 Pam2-ODN treatment reduced SeV burden at every time point measured, reflecting the  
219 inducible antiviral capacity of isolated epithelial cells (Supplementary Figure 4). Further,  
220 we investigated whether the principal Pam2-ODN effect occurred before (extracellular)  
221 or after (intracellular) virus internalization into their epithelial targets. SeV inoculation  
222 was carried out at 4<sup>o</sup> C preventing SeV internalization while allowing SeV attachment to  
223 epithelial cells (26-28). Using multiple methods to determine the effect of Pam2-ODN on  
224 SeV attachment, we found no differences in attachment (Figure 5A-D). However, even  
225 though similar numbers of virus particles were attached to epithelial cells, when these  
226 attached virus particles were liberated from the epithelial cell targets, virus particles  
227 from Pam2-ODN-treated epithelial cells were less able to subsequently infect other  
228 naive epithelial cells (Figure 5E, F). As the number of attached virus particles was the  
229 same, this difference in SeV burden in cells that received liberated virus particles from  
230 PBS vs Pam2-ODN treated cells indicated that SeV is inactivated prior to epithelial  
231 internalization.

232

### 233 **Pam2-ODN-induced epithelial ROS protect against SeV infection and CD8<sup>+</sup> T cell** 234 **immunopathology**

235 The anti-influenza response initiated by Pam2-ODN requires epithelial generation of  
236 ROS from both NADPH-dependent dual oxidase and mitochondrial sources (22, 23).  
237 Extending these findings to the SeV model, an NADPH oxidase inhibitor (GKT 137831)  
238 fully abrogated the Pam2-ODN-induced anti-SeV response (Figure 6A). Similarly,  
239 treatment with a combination of FCCP (an uncoupler of oxidative phosphorylation) and

240 TTFA (a complex II inhibitor) obviated the Pam2-ODN-induced anti-SeV response  
241 (Figure 6B) (22, 23). Further, it was found that Pam2-ODN induced epithelial generation  
242 of ROS were required for inactivation of SeV prior to epithelial entry (Figure 6C).  
243 Congruent with these *in vitro* and *ex vivo* studies, mice treated with FCCP and TTFA  
244 before Pam2-ODN treatment and SeV challenge (Figure 6D) demonstrated reduced  
245 survival (Figure 6E), increased SeV burden (Figure 6F), and increased CD8<sup>+</sup> T cells on  
246 day 10 (Figure 6G).

247

## 248 **Discussion**

249 In this study, we demonstrate that therapeutic stimulation of lung epithelial cells  
250 enhances mouse survival of acute SeV infections by both reducing the virus burden and  
251 attenuating host immunopathology. While our group has demonstrated inducible  
252 resistance against multiple respiratory pathogens including viruses (18-23, 31), these  
253 studies demonstrate for the first time when in the virus lifecycle the anti-viral effects  
254 begin (*viz.*, prior to internalization), and substantiate the role of ROS in protection  
255 against SeV.

256

257 While Pam2-ODN treatment provided a significant host survival benefit in SeV infection,  
258 we observed this survival benefit occurring after the time when PBS-treated mice had  
259 cleared the virus. This observation prompted the hypothesis that host mortality is not the  
260 exclusive result of direct viral injury to the lungs, but due at least in part to the host  
261 response to the virus infections. We observed enhanced survival of SeV infections in

262 mice depleted of CD8<sup>+</sup> T cells 8 days after infection (Figure 4A,B), revealing the  
263 importance of balancing the dual functions of CD8<sup>+</sup> T cells in anti-viral immunity and in  
264 causing fatal immunopathology. Our findings suggest that the surge in CD8<sup>+</sup> T cells  
265 within the lungs after most virus has been cleared causes physiologic impairment via  
266 lung injury and cell death (Figure 4D). These observations demonstrate an advantage of  
267 early immune stimulation to enhance viral clearance and late immune suppression to  
268 prevent immunopathology and enhance overall outcome of respiratory infections. This is  
269 potentially informative in the context of treating pneumonia in immunocompromised  
270 patients, and is likely applicable to broader clinical populations, including those suffering  
271 lung injury associated with SARS-CoV-2. Based on this reasoning, clinical trials of the  
272 use of Pam2-ODN to prevent or treat early COVID-19 have been launched  
273 (NCT04313023, NCT04312997), and we suggest that therapeutic targeting of CD8<sup>+</sup> T  
274 cells later in COVID-19 be considered.

275

276 Previous reports support the concept of counter-balanced immune protection and  
277 immunopathology by CD8<sup>+</sup> T cells during virus infections (36-41). Some reports have  
278 shown that antigen-experienced memory CD8<sup>+</sup> T cells enhance respiratory syncytial  
279 virus (RSV) clearance, but also mediate severe immunopathology (39, 42). However,  
280 our study is the first to demonstrate the survival advantage in paramyxovirus respiratory  
281 infection of either stimulating the lungs' mucosal defenses early in the infection or of  
282 suppressing the CD8<sup>+</sup> T cells later in the infection. Our findings are also congruent with  
283 reports on the role of CD8<sup>+</sup> T cells in non-respiratory viral infection models, such as in  
284 West Nile virus infection, where CD8<sup>+</sup> T cell deficient mice display decreased mortality

285 (40). While findings from that study and others reveal that the harmful effects of CD8<sup>+</sup> T  
286 cell mediated immunopathology may supersede the benefits of T cell mediated viral  
287 clearance, the question arises of what might be the adaptive value of the vigorous late  
288 CD8<sup>+</sup> T cell response. One possibility is that it might ensure that the infection does not  
289 flare again, but that seems implausible since the host has successfully defended itself  
290 against the initial infection, and innate immune mechanisms presumably remain intact  
291 and are possibly primed (43, 44), in addition to the multiple adaptive immune  
292 mechanisms that increasingly come into play. The possibility that the immunopathology  
293 simply results from an error on the part of the immune system also seems implausible in  
294 view of the substantial rate of host mortality, suggesting there is likely an adaptive value  
295 to the response. A third possibility, that the persistence of pockets of low level infection  
296 might lead to chronic lung pathology, is supported by a recent study showing that sites  
297 of viral RNA remnants following influenza infection are linked to chronic lung disease  
298 (45). Thus, a trade-off may exist between the adaptive value of a vigorous CD8<sup>+</sup> T cell  
299 response to prevent chronic lung disease and the acute mortality it can cause.  
300 Manipulating this balance therapeutically will need to account for both the benefits and  
301 costs of the response. It is particularly appealing to develop inducible anti-microbial  
302 strategies that do not rely on conventional T cell-mediated microbial clearance and are  
303 also effective in vulnerable immune deficient populations (18, 22, 25, 46).

304

305 Although the CD8<sup>+</sup> T cell depletion studies enhanced our understanding of  
306 immunopathology in virus infections, much of the survival benefit against SeV infection  
307 was mediated by rapid anti-viral effects induced by Pam2-ODN. This led us to

308 investigate the mechanisms of these inducible anti-viral effects. Given the multiple steps  
309 in the virus life cycle, it was not known at what stage Pam2-ODN exerted its anti-viral  
310 effect. Exploring this, we found no difference in number of SeV particles attached to the  
311 cells between PBS and Pam2-ODN treatment (Figure 5A-D). However, attached virus  
312 particles that were liberated from Pam2-ODN treated cells retained less infective  
313 capacity when added to naïve epithelial cells, revealing pre-internalization virus  
314 inactivation by Pam2-ODN treatment (Figure 5E, F).

315

316 Knowing that Pam2-ODN inducible resistance required ROS production to protect  
317 against influenza (22), we studied the role of ROS in Pam2-ODN-mediated reduction in  
318 SeV burden. ROS inhibition not only led to attenuation of Pam2-ODN's anti-viral effect  
319 but allowed increased lung CD8<sup>+</sup> T cell numbers, implicating Pam2-ODN-induced ROS  
320 in preventing both identified mechanisms of mouse mortality in SeV pneumonia (Figure  
321 6). ROS inhibition led to loss of Pam2-ODN-inducible *in vitro* inactivation of SeV prior to  
322 epithelial internalization (Figure 6C), demonstrating for the first time that epithelial ROS  
323 directly contribute to virus inactivation.

324

325 Production of ROS as a microbicidal mechanism has been widely reported in  
326 phagocytic cells (47-49). However, this mechanism has not been extensively studied in  
327 non-phagocytic cells (50), where it apparently acts predominantly extracellularly rather  
328 than intracellularly as in phagocytes. (Figure 5F, G). These findings of viral inactivation

329 by epithelial ROS production reveal an essential component of inducible epithelial  
330 resistance.

331

332 Taken together, these findings provide mechanistic insights into the antiviral responses  
333 generated by the lung epithelium and the prevention of host immunopathology that may  
334 inform future therapeutics to target immunomodulation as a means to improve the  
335 survival of respiratory infections in vulnerable populations.

336

#### 337 **Acknowledgments and Disclosures:**

338 The authors would like to thank Dr. Yongxing Wang for optimization of ROS inhibition  
339 experiments. M.J.T., B.F.D., and S.E.E. are authors on U.S. patent 8,883,174,  
340 “Stimulation of Innate Resistance of the Lungs to Infection with Synthetic Ligands.”  
341 M.J.T., B.F.D., and S.E.E. own stock in Pulmotect, Inc., which holds the commercial  
342 options on these patent disclosures. All other authors declare that no conflict of interest  
343 exists.

344

#### 345 **References:**

- 346 1. Mizgerd JP. Lung infection--a public health priority. *PLoS medicine*  
347 2006;3(2):e76.
- 348 2. Luckhaupt SE, Sweeney MH, Funk R, Calvert GM, Nowell M, D'Mello T,  
349 Reingold A, Meek J, Yousey-Hindes K, Arnold KE, et al. Influenza-associated



- 350 hospitalizations by industry, 2009-10 influenza season, united states. *Emerging*  
351 *infectious diseases* 2012;18(4):556-562.
- 352 3. Thompson WW, Shay DK, Weintraub E, Brammer L, Cox N, Anderson LJ,  
353 Fukuda K. Mortality associated with influenza and respiratory syncytial virus in the  
354 united states. *Jama* 2003;289(2):179-186.
- 355 4. Jain S, Self WH, Wunderink RG, Fakhran S, Balk R, Bramley AM, Reed C,  
356 Grijalva CG, Anderson EJ, Courtney DM, et al. Community-acquired pneumonia  
357 requiring hospitalization among u.S. Adults. *N Engl J Med* 2015;373(5):415-427.
- 358 5. Jain S, Williams DJ, Arnold SR, Ampofo K, Bramley AM, Reed C, Stockmann C,  
359 Anderson EJ, Grijalva CG, Self WH, et al. Community-acquired pneumonia requiring  
360 hospitalization among u.S. Children. *N Engl J Med* 2015;372(9):835-845.
- 361 6. Fauci AS, Lane HC, Redfield RR. Covid-19 - navigating the uncharted. *N Engl J*  
362 *Med* 2020;382(13):1268-1269.
- 363 7. Taubenberger JK, Kash JC, Morens DM. The 1918 influenza pandemic: 100  
364 years of questions answered and unanswered. *Sci Transl Med* 2019;11(502).
- 365 8. Wang X, Li Y, O'Brien KL, Madhi SA, Widdowson MA, Byass P, Omer SB, Abbas  
366 Q, Ali A, Amu A, et al. Global burden of respiratory infections associated with seasonal  
367 influenza in children under 5 years in 2018: A systematic review and modelling study.  
368 *Lancet Glob Health* 2020;8(4):e497-e510.
- 369 9. Li Q, Guan X, Wu P, Wang X, Zhou L, Tong Y, Ren R, Leung KSM, Lau EHY,  
370 Wong JY, et al. Early transmission dynamics in wuhan, china, of novel coronavirus-  
371 infected pneumonia. *N Engl J Med* 2020;382(13):1199-1207.

- 372 10. Busse WW, Lemanske RF, Jr., Gern JE. Role of viral respiratory infections in  
373 asthma and asthma exacerbations. *Lancet* 2010;376(9743):826-834.
- 374 11. Folkerts G, Busse WW, Nijkamp FP, Sorkness R, Gern JE. Virus-induced airway  
375 hyperresponsiveness and asthma. *American journal of respiratory and critical care*  
376 *medicine* 1998;157(6 Pt 1):1708-1720.
- 377 12. Holtzman MJ, Byers DE, Brett JA, Patel AC, Agapov E, Jin X, Wu K. Linking  
378 acute infection to chronic lung disease. The role of il-33-expressing epithelial progenitor  
379 cells. *Annals of the American Thoracic Society* 2014;11 Suppl 5:S287-291.
- 380 13. Olin JT, Wechsler ME. Asthma: Pathogenesis and novel drugs for treatment. *Bmj*  
381 2014;349:g5517.
- 382 14. Shaw DE, Green RH, Bradding P. Asthma exacerbations: Prevention is better  
383 than cure. *Therapeutics and clinical risk management* 2005;1(4):273-277.
- 384 15. Ibricevic A, Pekosz A, Walter MJ, Newby C, Battaile JT, Brown EG, Holtzman  
385 MJ, Brody SL. Influenza virus receptor specificity and cell tropism in mouse and human  
386 airway epithelial cells. *J Virol* 2006;80(15):7469-7480.
- 387 16. Byers DE, Alexander-Brett J, Patel AC, Agapov E, Dang-Vu G, Jin X, Wu K, You  
388 Y, Alevy Y, Girard JP, et al. Long-term il-33-producing epithelial progenitor cells in  
389 chronic obstructive lung disease. *The Journal of clinical investigation* 2013;123(9):3967-  
390 3982.
- 391 17. Leiva-Juarez MM, Kolls JK, Evans SE. Lung epithelial cells: Therapeutically  
392 inducible effectors of antimicrobial defense. *Mucosal immunology* 2018;11(1):21-34.

- 393 18. Cleaver JO, You D, Michaud DR, Pruneda FA, Juarez MM, Zhang J, Weill PM,  
394 Adachi R, Gong L, Moghaddam SJ, et al. Lung epithelial cells are essential effectors of  
395 inducible resistance to pneumonia. *Mucosal immunology* 2014;7(1):78-88.
- 396 19. Duggan JM, You D, Cleaver JO, Larson DT, Garza RJ, Guzman Pruneda FA,  
397 Tuvim MJ, Zhang J, Dickey BF, Evans SE. Synergistic interactions of tlr2/6 and tlr9  
398 induce a high level of resistance to lung infection in mice. *Journal of immunology*  
399 2011;186(10):5916-5926.
- 400 20. Evans SE, Tuvim MJ, Fox CJ, Sachdev N, Gibiansky L, Dickey BF. Inhaled  
401 innate immune ligands to prevent pneumonia. *British journal of pharmacology*  
402 2011;163(1):195-206.
- 403 21. Tuvim MJ, Gilbert BE, Dickey BF, Evans SE. Synergistic tlr2/6 and tlr9 activation  
404 protects mice against lethal influenza pneumonia. *PLoS One* 2012;7(1):e30596.
- 405 22. Kirkpatrick CT, Wang Y, Leiva Juarez MM, Shivshankar P, Pantaleon Garcia J,  
406 Plumer AK, Kulkarni VV, Ware HH, Gulraiz F, Chavez Cavasos MA, et al. Inducible lung  
407 epithelial resistance requires multisource reactive oxygen species generation to protect  
408 against viral infections. *mBio* 2018;9(3).
- 409 23. Ware HH, Kulkarni VV, Wang Y, Pantaleon Garcia J, Leiva Juarez M, Kirkpatrick  
410 CT, Wali S, Syed S, Kontoyiannis AD, Sikkema WKA, et al. Inducible lung epithelial  
411 resistance requires multisource reactive oxygen species generation to protect against  
412 bacterial infections. *PLoS One* 2019;14(2):e0208216.
- 413 24. Goldblatt DL, Flores JR, Valverde Ha G, Jaramillo AM, Tkachman S, Kirkpatrick  
414 CT, Wali S, Hernandez B, Ost DE, Scott BL, et al. Inducible epithelial resistance against

- 415 acute sendai virus infection prevents chronic asthma-like lung disease in mice. *British*  
416 *journal of pharmacology* 2020.
- 417 25. Leiva-Juarez MM, Ware HH, Kulkarni VV, Zweidler-McKay PA, Tuvim MJ, Evans  
418 SE. Inducible epithelial resistance protects mice against leukemia-associated  
419 pneumonia. *Blood* 2016;128(7):982-992.
- 420 26. Tscherne DM, Jones CT, Evans MJ, Lindenbach BD, McKeating JA, Rice CM.  
421 Time- and temperature-dependent activation of hepatitis c virus for low-ph-triggered  
422 entry. *J Virol* 2006;80(4):1734-1741.
- 423 27. Haywood AM, Boyer BP. Sendai virus membrane fusion: Time course and effect  
424 of temperature, ph, calcium, and receptor concentration. *Biochemistry*  
425 1982;21(24):6041-6046.
- 426 28. Tai CJ, Li CL, Tai CJ, Wang CK, Lin LT. Early viral entry assays for the  
427 identification and evaluation of antiviral compounds. *J Vis Exp* 2015(105):e53124.
- 428 29. Hines EA, Szakaly RJ, Leng N, Webster AT, Verheyden JM, Lashua AJ,  
429 Kendzioriski C, Rosenthal LA, Gern JE, Sorkness RL, et al. Comparison of temporal  
430 transcriptomic profiles from immature lungs of two rat strains reveals a viral response  
431 signature associated with chronic lung dysfunction. *PLoS One* 2014;9(12):e112997.
- 432 30. Look DC, Walter MJ, Williamson MR, Pang L, You Y, Sreshta JN, Johnson JE,  
433 Zander DS, Brody SL. Effects of paramyxoviral infection on airway epithelial cell foxj1  
434 expression, ciliogenesis, and mucociliary function. *Am J Pathol* 2001;159(6):2055-2069.
- 435 31. Alfaro VY, Goldblatt DL, Valverde GR, Munsell MF, Quinton LJ, Walker AK,  
436 Dantzer R, Varadhachary A, Scott BL, Evans SE, et al. Safety, tolerability, and

- 437 biomarkers of the treatment of mice with aerosolized toll-like receptor ligands. *Front*  
438 *Pharmacol* 2014;5:8.
- 439 32. Bekker V, Scherpbier H, Beld M, Piriou E, van Breda A, Lange J, van Leth F,  
440 Jurriaans S, Alders S, Wertheim-van Dillen P, et al. Epstein-barr virus infects b and non-  
441 b lymphocytes in hiv-1-infected children and adolescents. *J Infect Dis*  
442 2006;194(9):1323-1330.
- 443 33. Shearer WT, Easley KA, Goldfarb J, Rosenblatt HM, Jenson HB, Kovacs A,  
444 McIntosh K. Prospective 5-year study of peripheral blood cd4, cd8, and cd19/cd20  
445 lymphocytes and serum igs in children born to hiv-1 women. The p(2)c(2) hiv study  
446 group. *J Allergy Clin Immunol* 2000;106(3):559-566.
- 447 34. Cannon MJ, Stott EJ, Taylor G, Askonas BA. Clearance of persistent respiratory  
448 syncytial virus infections in immunodeficient mice following transfer of primed t cells.  
449 *Immunology* 1987;62(1):133-138.
- 450 35. Graham BS, Bunton LA, Wright PF, Karzon DT. Role of t lymphocyte subsets in  
451 the pathogenesis of primary infection and rechallenge with respiratory syncytial virus in  
452 mice. *The Journal of clinical investigation* 1991;88(3):1026-1033.
- 453 36. Schmidt ME, Varga SM. Cytokines and cd8 t cell immunity during respiratory  
454 syncytial virus infection. *Cytokine* 2018.
- 455 37. Duan S, Thomas PG. Balancing immune protection and immune pathology by  
456 cd8(+) t-cell responses to influenza infection. *Front Immunol* 2016;7:25.
- 457 38. Hou S, Doherty PC, Zijlstra M, Jaenisch R, Katz JM. Delayed clearance of sendai  
458 virus in mice lacking class i mhc-restricted cd8+ t cells. *Journal of immunology*  
459 1992;149(4):1319-1325.

- 460 39. Schmidt ME, Knudson CJ, Hartwig SM, Pewe LL, Meyerholz DK, Langlois RA,  
461 Harty JT, Varga SM. Memory cd8 t cells mediate severe immunopathology following  
462 respiratory syncytial virus infection. *PLoS Pathog* 2018;14(1):e1006810.
- 463 40. Wang Y, Lobigs M, Lee E, Mullbacher A. Cd8+ t cells mediate recovery and  
464 immunopathology in west nile virus encephalitis. *J Virol* 2003;77(24):13323-13334.
- 465 41. Connors TJ, Ravindranath TM, Bickham KL, Gordon CL, Zhang F, Levin B, Baird  
466 JS, Farber DL. Airway cd8(+) t cells are associated with lung injury during infant viral  
467 respiratory tract infection. *Am J Respir Cell Mol Biol* 2016;54(6):822-830.
- 468 42. Cannon MJ, Openshaw PJ, Askonas BA. Cytotoxic t cells clear virus but  
469 augment lung pathology in mice infected with respiratory syncytial virus. *J Exp Med*  
470 1988;168(3):1163-1168.
- 471 43. Kaufmann E, Sanz J, Dunn JL, Khan N, Mendonca LE, Pacis A, Tzelepis F,  
472 Pernet E, Dumaine A, Grenier JC, et al. Bcg educates hematopoietic stem cells to  
473 generate protective innate immunity against tuberculosis. *Cell* 2018;172(1-2):176-190  
474 e119.
- 475 44. Netea MG, Joosten LAB. Trained immunity and local innate immune memory in  
476 the lung. *Cell* 2018;175(6):1463-1465.
- 477 45. Keeler SP, Agapov EV, Hinojosa ME, Letvin AN, Wu K, Holtzman MJ. Influenza  
478 a virus infection causes chronic lung disease linked to sites of active viral rna remnants.  
479 *Journal of immunology* 2018;201(8):2354-2368.
- 480 46. Evans SE, Xu Y, Tuvim MJ, Dickey BF. Inducible innate resistance of lung  
481 epithelium to infection. *Annu Rev Physiol* 2010;72:413-435.

- 482 47. Forman HJ, Torres M. Reactive oxygen species and cell signaling: Respiratory  
483 burst in macrophage signaling. *American journal of respiratory and critical care*  
484 *medicine* 2002;166(12 Pt 2):S4-8.
- 485 48. Huang J, Canadien V, Lam GY, Steinberg BE, Dinauer MC, Magalhaes MA,  
486 Glogauer M, Grinstein S, Brumell JH. Activation of antibacterial autophagy by nadph  
487 oxidases. *Proc Natl Acad Sci U S A* 2009;106(15):6226-6231.
- 488 49. Yang CS, Shin DM, Kim KH, Lee ZW, Lee CH, Park SG, Bae YS, Jo EK. Nadph  
489 oxidase 2 interaction with tlr2 is required for efficient innate immune responses to  
490 mycobacteria via cathelicidin expression. *Journal of immunology* 2009;182(6):3696-  
491 3705.
- 492 50. Paiva CN, Bozza MT. Are reactive oxygen species always detrimental to  
493 pathogens? *Antioxid Redox Signal* 2014;20(6):1000-1037.
- 494
- 495
- 496
- 497
- 498
- 499
- 500
- 501
- 502

503 **Table 1**

| <b>Antibodies</b> | <b>Vendor</b>     | <b>Catalogue numbers</b> |
|-------------------|-------------------|--------------------------|
| CD3               | Tonbo             | 65-0031-U100             |
| CD4               | Tonbo             | 60-0042-U100             |
| CD8               | Tonbo             | 25-0081-U100             |
| Live dead         | Tonbo             | 13-0870-T500             |
| CD25              | Biolegend         | 102038                   |
| Foxp3 Treg kit    | eBiosciences      | 72-5775                  |
| CD8-Depleting Ab  | Bioxell           | BE0223-A025              |
| CD19              | Biolegend         | 115507                   |
| B220              | BD Biosciences    | 562922                   |
| Anti-SeV virus Ab | MBL International | PD029                    |
| Ki67              | Invitrogen        | MA5-14520                |
| cCasp3            | Cell signaling    | 9662S                    |

504

505

506 **Figure Legends**

507 **Figure 1. Pam2-ODN enhances mouse survival of SeV infection and reduces lung**  
508 **virus burden. (A)** Survival of mice treated with PBS or Pam2-ODN one day prior to  
509 SeV virus challenge. **(B)** Mouse lung SeV burden 5 days after infection assessed by  
510 qPCR for Sendai Matrix (M) gene (Relative quantification, RQ to 18S) relative to 18S.



511 **(C)** Time course of lung SeV burden in mice treated with PBS or Pam2-ODN. **(D)** SeV  
512 inoculum dependent mouse survival. Data are representative from three independent  
513 experiments. n=10 mice per group in survival plots, n=4 mice/group in virus burden  
514 experiments. LOQ, limit of quantification. \* $p<0.05$ , \*\* $p<0.005$ .

515

516 **Figure 2. Pam2-ODN pretreatment reduces epithelial cell death and proliferation**  
517 **during acute SeV infection.** Cleaved caspase 3 (cCasp3) **(A)** or Ki67 **(B)** positive cells  
518 in mouse lung epithelium after SeV infection with or without Pam2-ODN treatment  
519 (lower panel). EdU positive cells in axial **(C)**, small airways **(D)** and parenchyma **(E)**  
520 after SeV infection with or without Pam2-ODN (lower panel). **(F)** Mouse lung histology  
521 following SeV challenge with or without Pam2-ODN. n=5 mice per condition. Data are  
522 representative from two independent experiments. Scale bar = 100  $\mu\text{m}$ . \* $p<0.05$ .

523

524 **Figure 3. Pam2-ODN pretreatment reduces SeV induced lung CD8<sup>+</sup> T cells. (A)**  
525 Differential Giemsa staining of BAL cells from mice challenged with SeV with or without  
526 Pam2-ODN pretreatment. **(B)** Flow cytometry for CD8<sup>+</sup> T cells from disaggregated  
527 mouse lungs 11 days after SeV infection with or without Pam2-ODN. **(C)** Lung CD8<sup>+</sup> T  
528 cells 11 days after SeV challenge in mice pretreated with PBS or Pam2-ODN. Data are  
529 representative of three independent experiments for (A) and of five independent  
530 experiments for (B) and (C). \* $p<0.05$  compared to PBS+SeV

531

532 **Figure 4. Pam2-ODN treatment reduces CD8<sup>+</sup> T cell associated SeV induced**  
533 **immunopathology.** Experimental outline **(A)**, survival **(B)** and percentage of CD8<sup>+</sup> T  
534 cells **(C)** from disaggregated mouse lungs 10 days after SeV challenge following  
535 pretreatment with PBS or Pam2-ODN and with or without CD8<sup>+</sup> T cells depleted on day  
536 8 of SeV challenge. **(D)** Lung histology 10 days after SeV challenged with or without  
537 Pam2-ODN treatment and/or CD8<sup>+</sup> T cells. Data are representative of two independent  
538 experiments. Scale bar = 100  $\mu$ m. n=16 mice/group for survival in experiment A and  
539 n=4 mice/group in experiment B. \*\*\*\* $p$ <0.0001 compared to PBS in (c), \*\*\* $p$ <0.0005  
540 compared to PBS in (B) and (C), † $p$ <0.05 compared to PBS, \* $p$ <0.05 compared to PBS.  
541

542 **Figure 5. Pam2-ODN inhibits SeV without altering attachment. (A)** Flow cytometry  
543 to measure virus attachment to epithelial cells 4 h after SeV challenge. **(B)** Percentage  
544 of SeV positive epithelial cells from **(A)**. **(C)** Representative examples of  
545 immunofluorescence for virus attachment. **(D)** Mean fluorescence intensity of SeV-  
546 exposed epithelial cells 4 h after SeV challenge. **(E)** Experimental outline showing viral  
547 attachment and prevention of virus internalization by epithelial cells. **(F)** SeV M gene  
548 expression in untreated MLE-15 cells (left) or primary tracheal epithelial cells (right)  
549 challenged with liberated virus (uninternalized virus particles) from cultures that had  
550 been pretreated with PBS or Pam2-ODN prior to SeV infection 24 h after transfer of  
551 liberated virus to new cells. Data are representative of five independent experiments.  
552 \* $p$ <0.05

553

554 **Figure 6. Pam2-ODN induced reactive oxygen species protects against acute SeV**  
555 **virus infections and immunopathology.** SeV burden in MLE-15 cells with or without  
556 treatment with Pam2-ODN and/or NADPH inhibitors **(A)** or mitoROS inhibitors **(B)**. **(C)**  
557 SeV M gene expression in untreated MLE-15 cells challenged with liberated virus from  
558 cells that had been pretreated with PBS or Pam2-ODN with or without mitoROS  
559 inhibition. **(D)** Experimental outline. **(E)** Survival of SeV challenge in mice treated with  
560 PBS or Pam2-ODN and/or mtROS inhibitors. **(F)** Lung SeV burden measured on day 5  
561 and **(G)** lung CD8<sup>+</sup> T cells assessed on day 10. Data are representative of three  
562 independent experiments. n=13 mice/group in experiment **D** and **E**. \*\*\* $p < 0.0001$ ,  
563 \*\* $p < 0.005$ , \*\* $p < 0.01$  compared to PBS, † $p < 0.05$  compared to Pam2-ODN-treated mice  
564 without ROS inhibition, \* $p < 0.05$ .

565

Wali, Figure 1

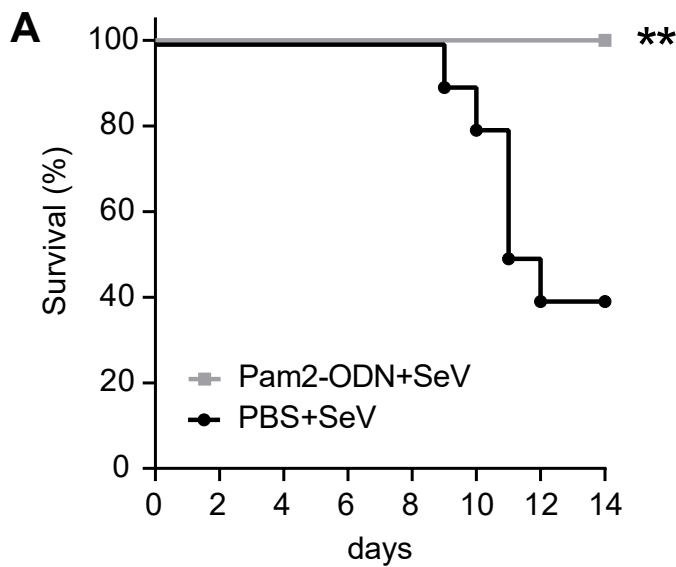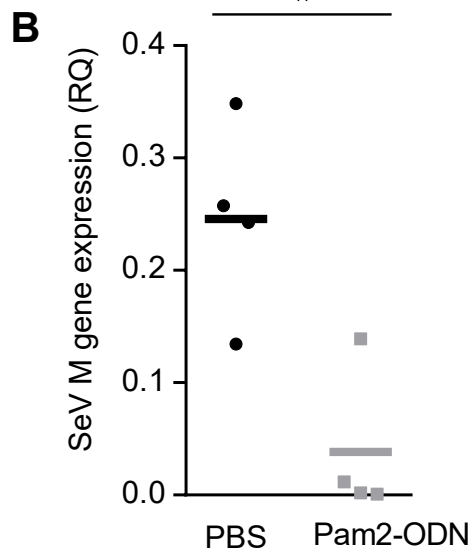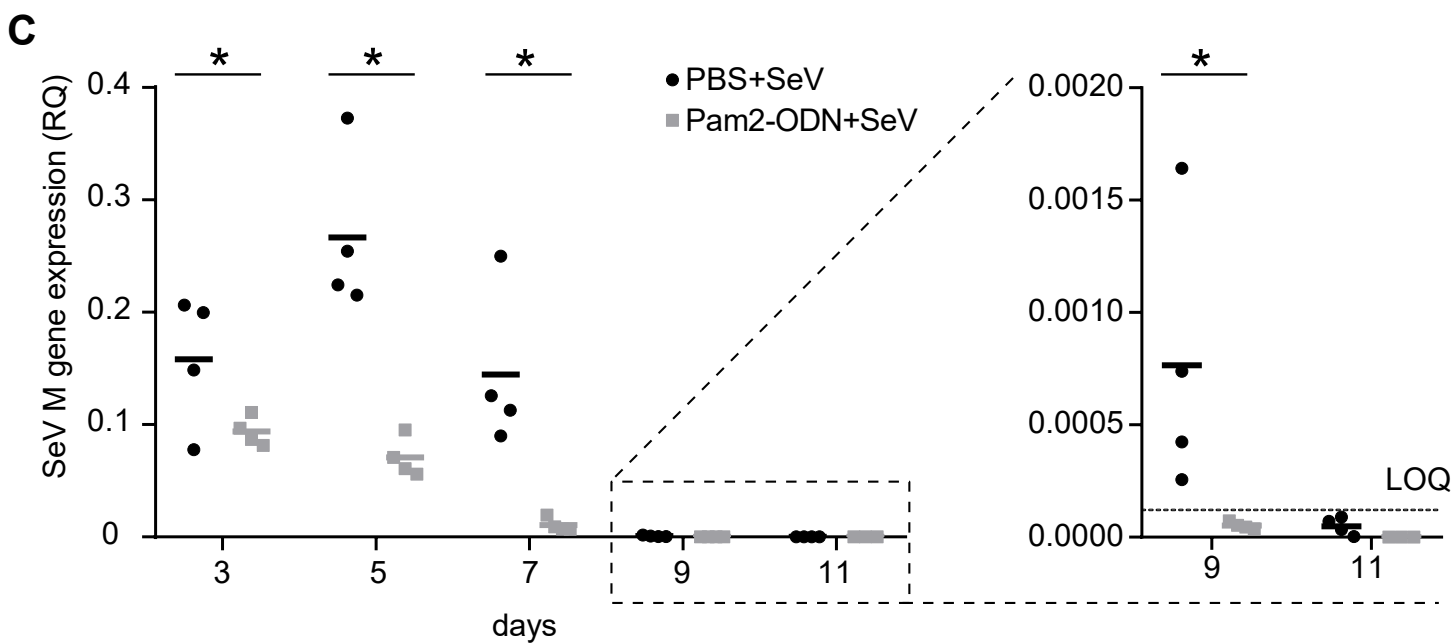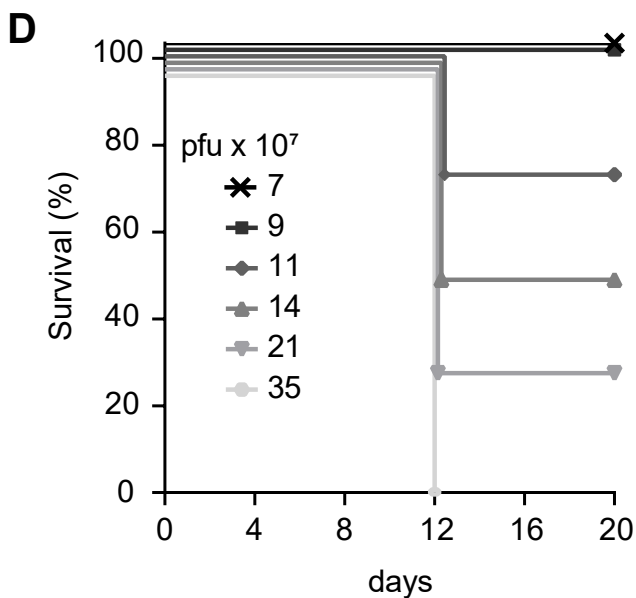

# Wali, Figure 2

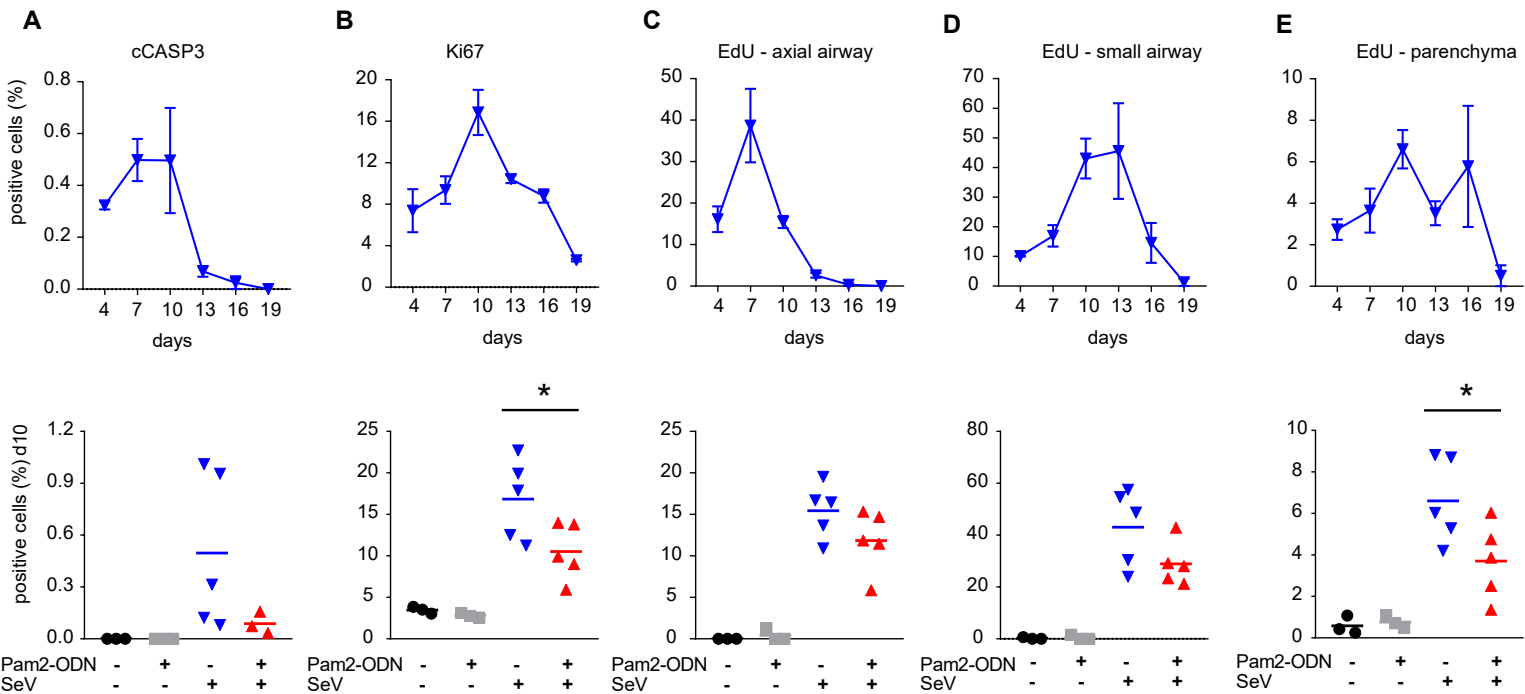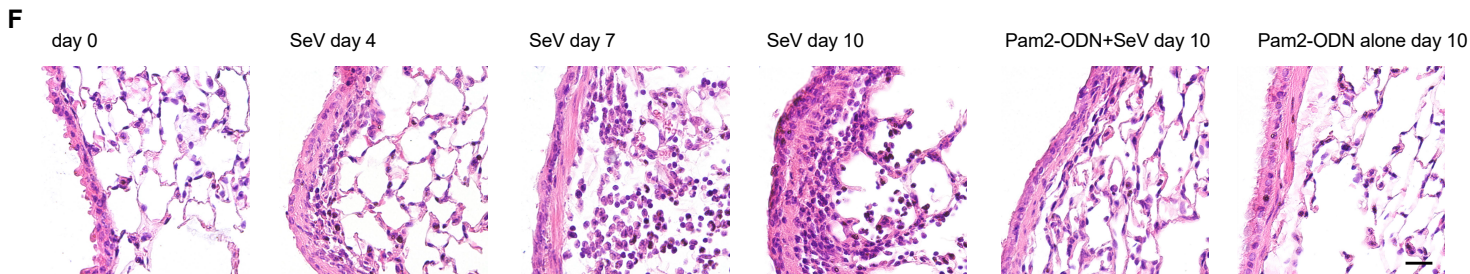

Wali, Figure 3

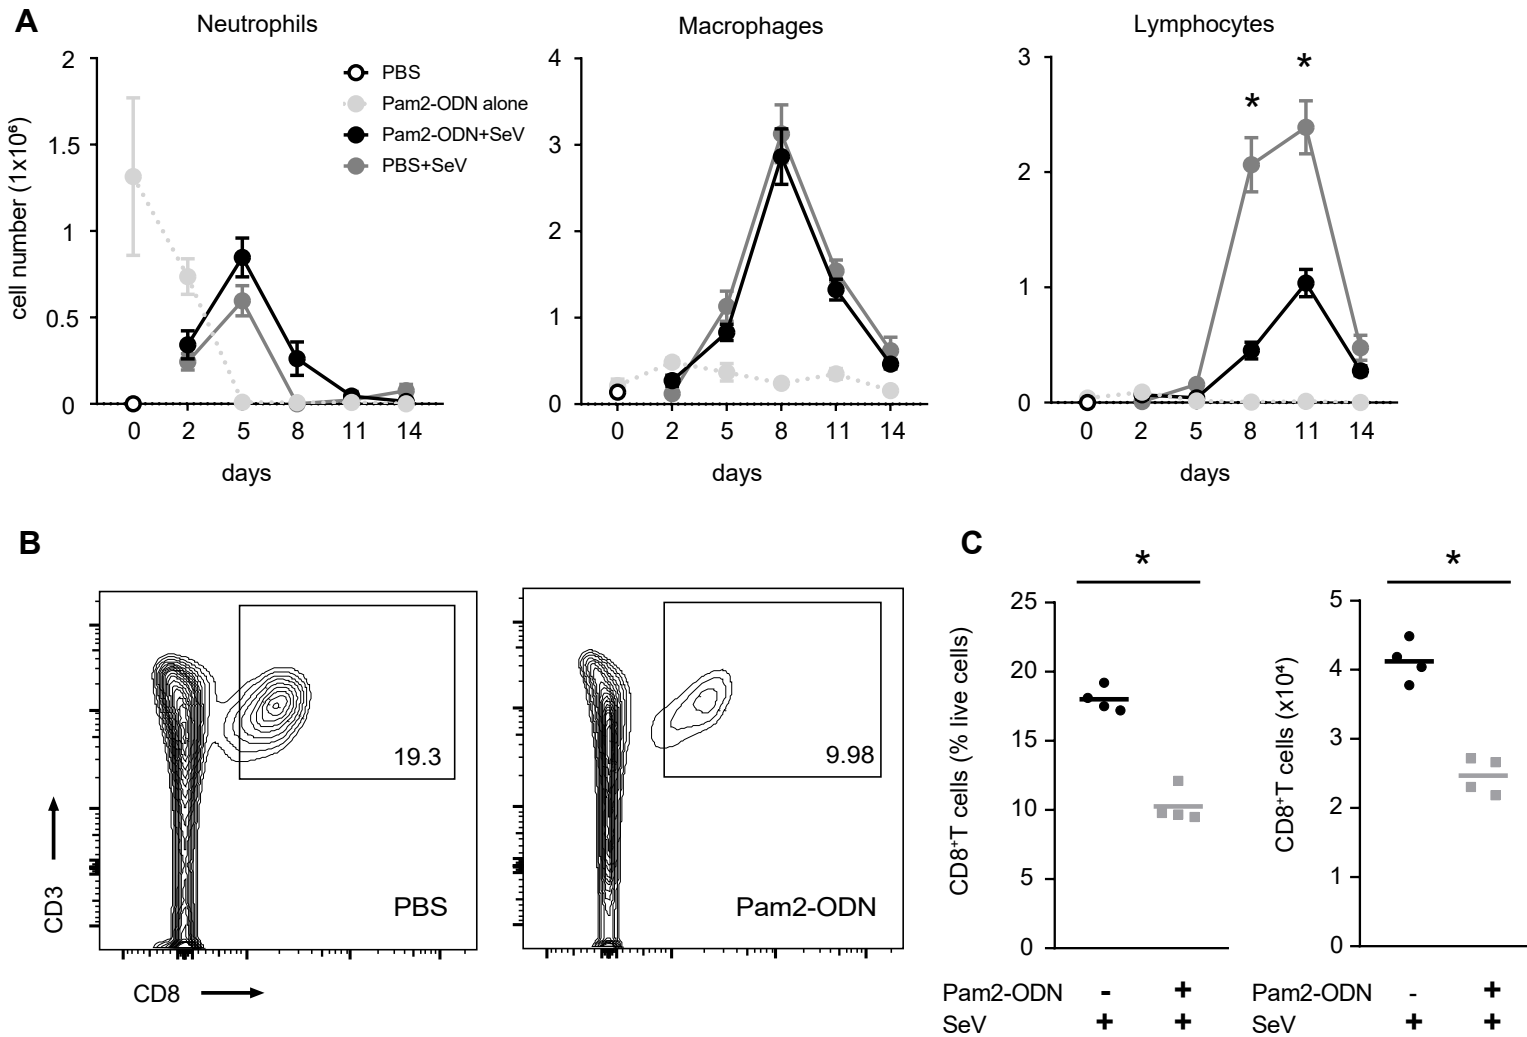

Wali, Figure 4

**A**

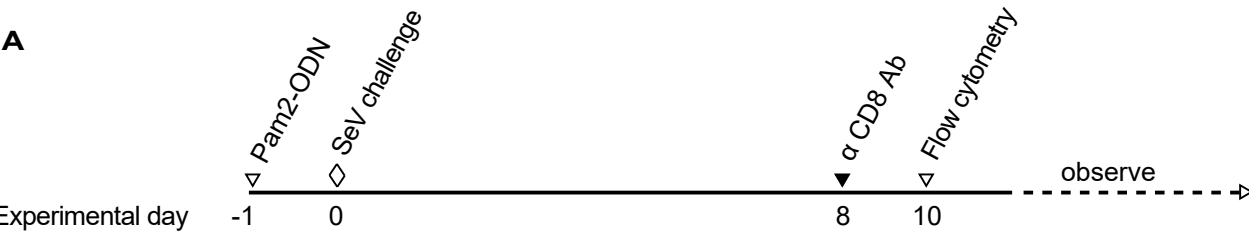

**B**

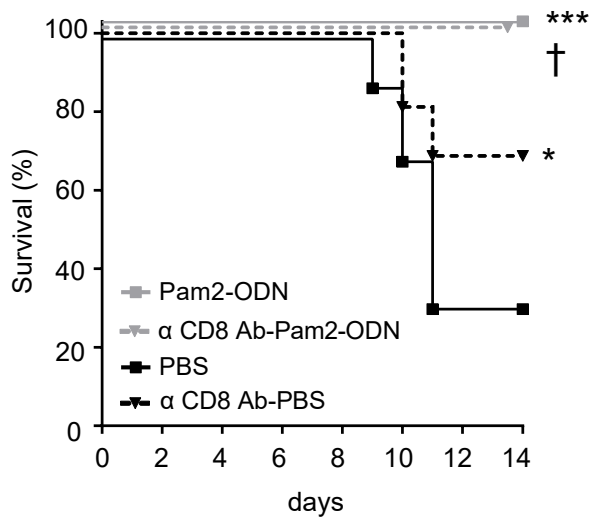

**C**

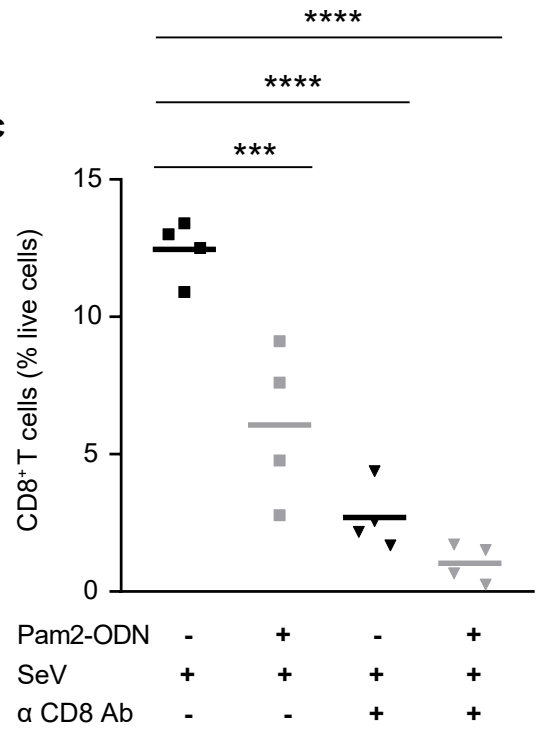

**D**

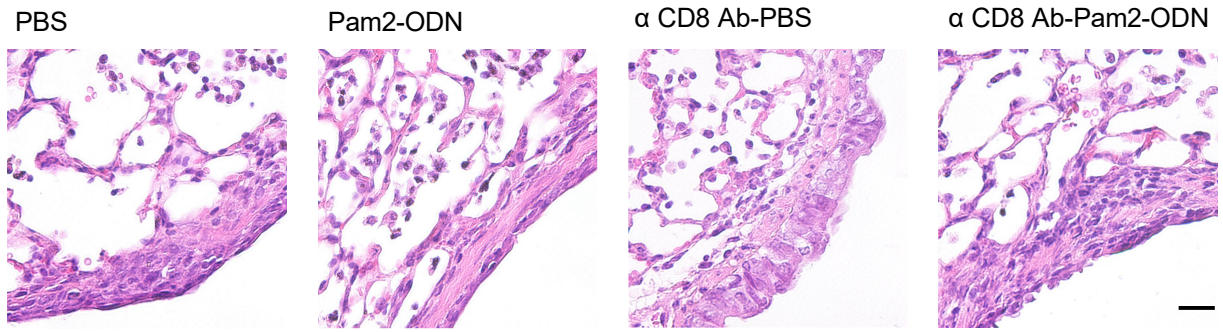

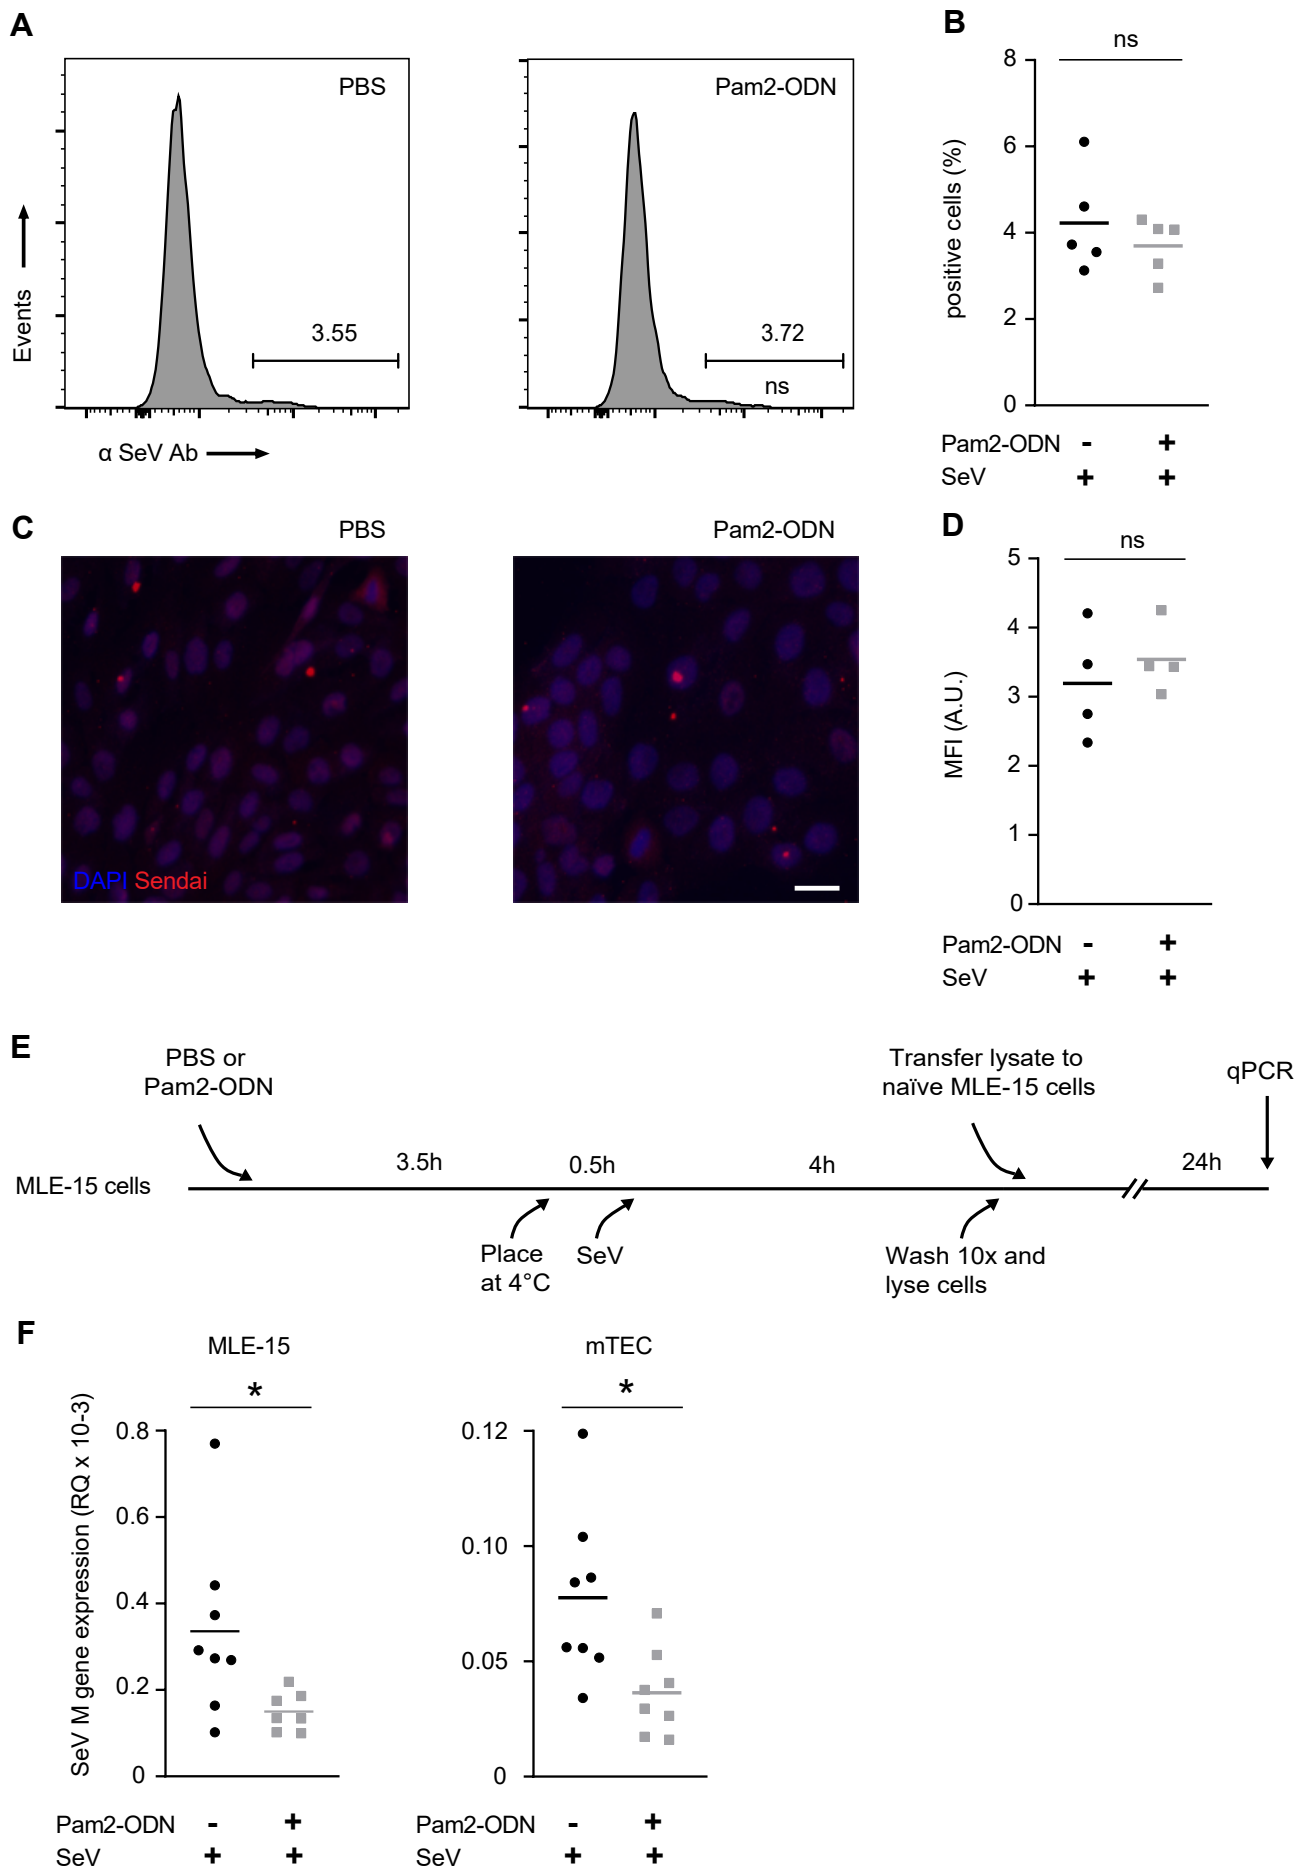



Wali, Figure 6

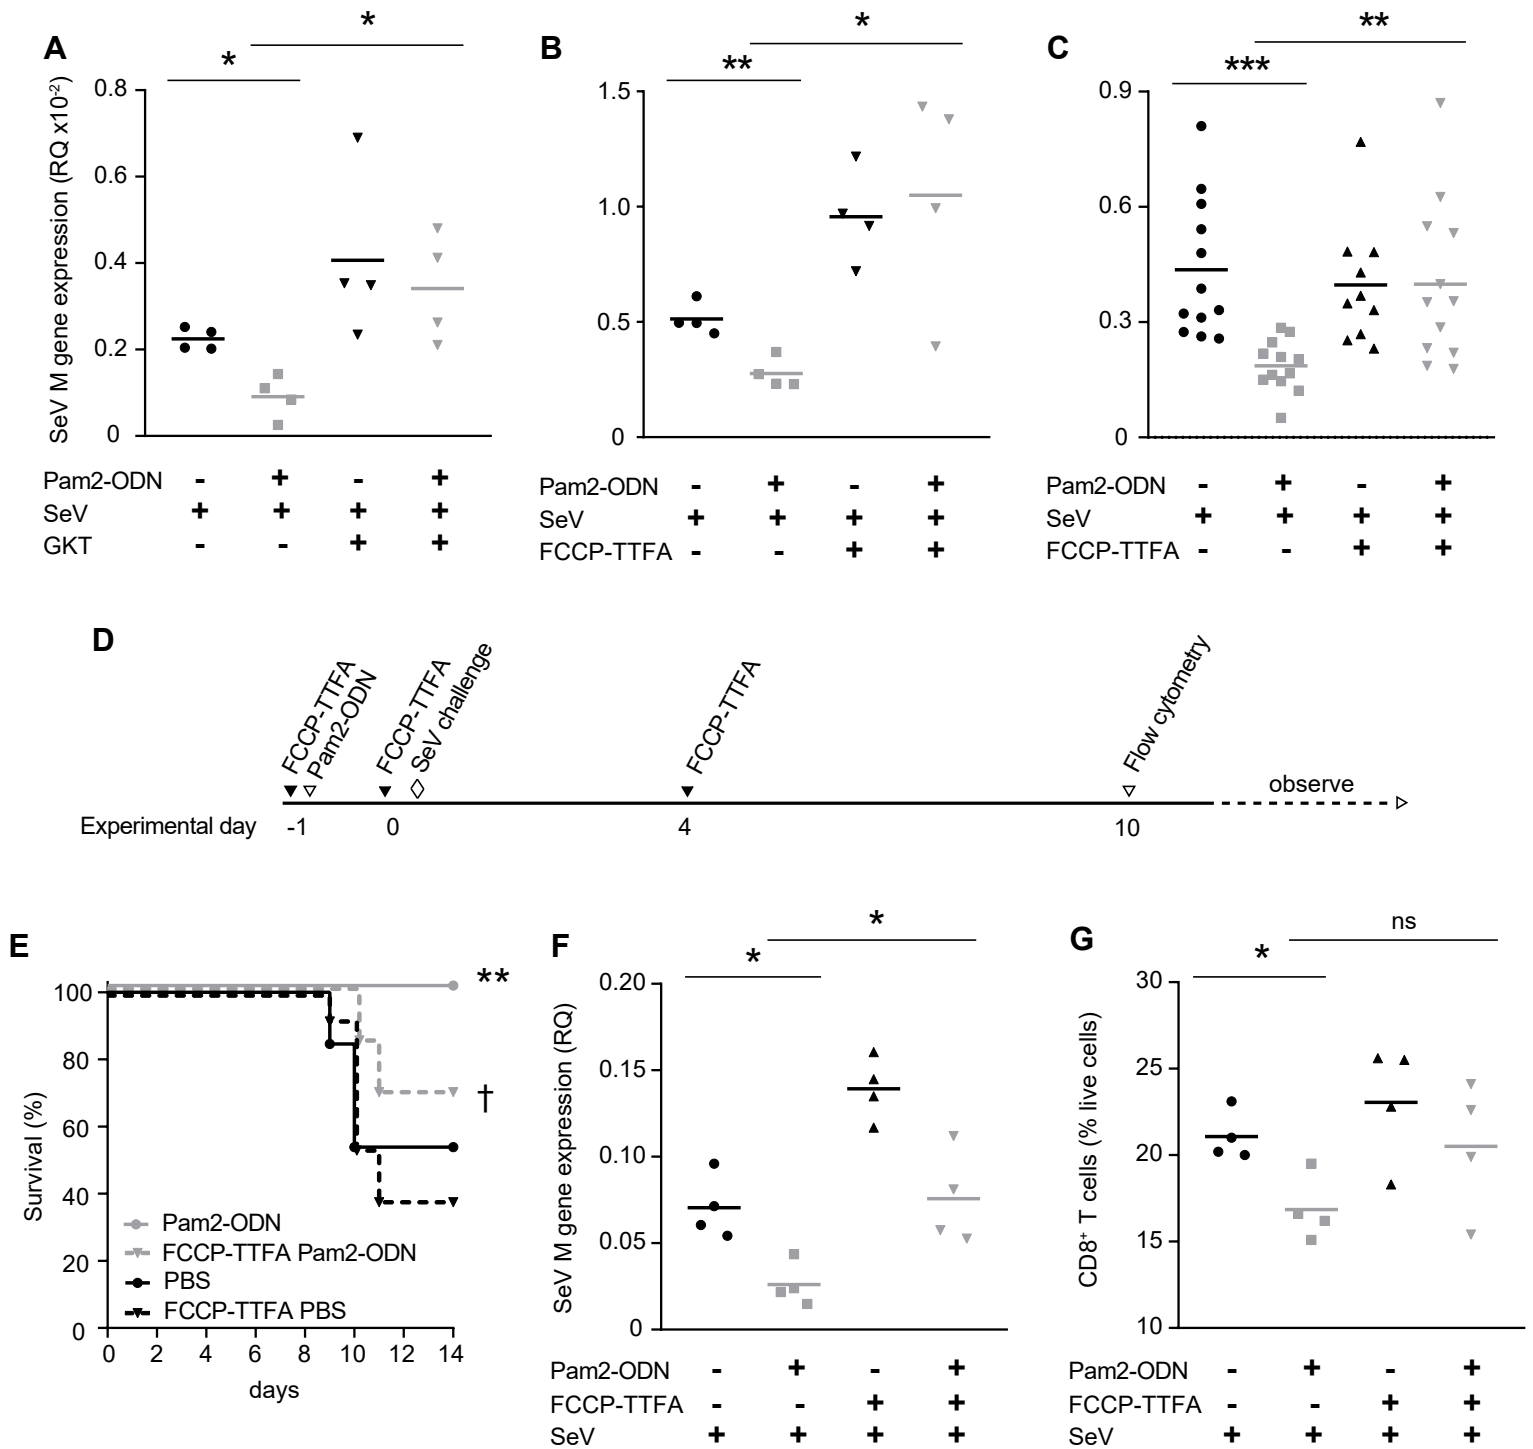

Source: http://biorxiv.org/content/10.1101/2020.04.16.045054v1.full.pdf
